# Supplementary material
Source: PubMed Central journal article supplement (PMC7703849)
Supplement: NIHMS1645499-supplement-Suppl_Figure_1.pdf [file NIHMS1645499-supplement-Suppl_Figure_1.pdf]

Supplemental Figure 1.

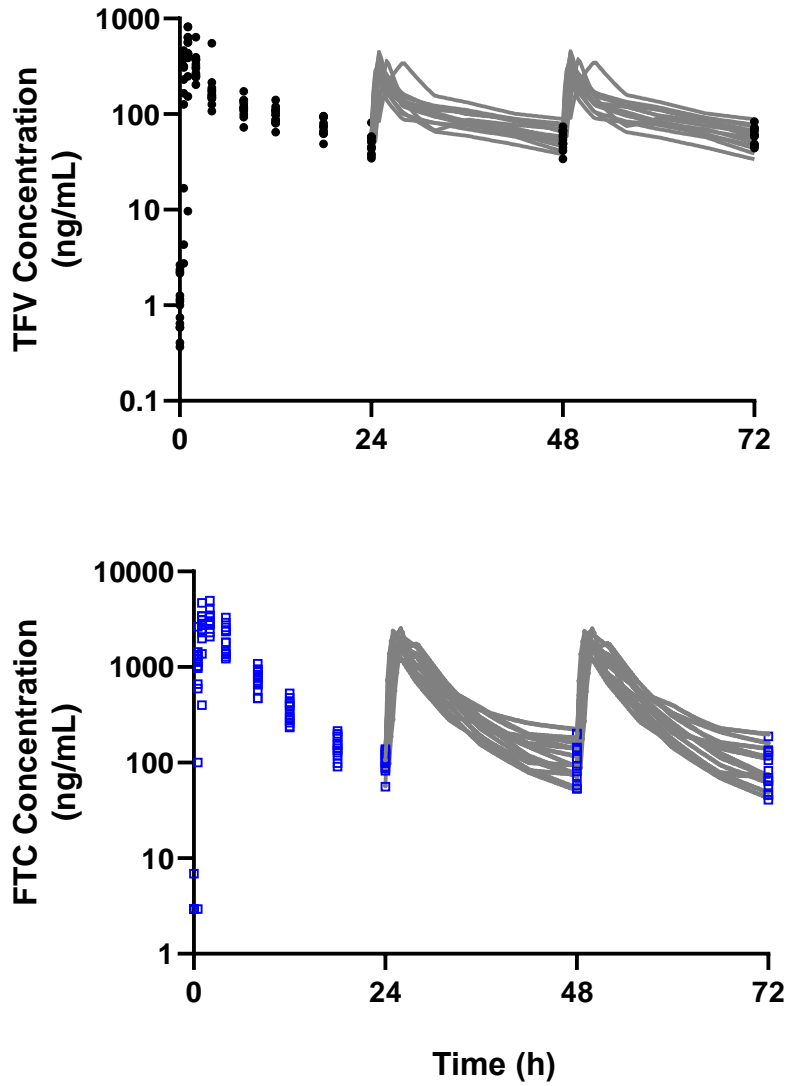

Figure 1. Individual concentration-time profiles for multiple-doses of TDF and FTC in control arm with predicted additional doses (grey lines) overlay observed data for TFV (black solid circles) and FTC (blue open squares).
